# Supplementary material for: Nonlinear Mixed‐Effects Model Development and Simulation Using nlmixr and Related R Open‐Source Packages
Source: PubMed Central journal article supplement — CPT Pharmacometrics Syst Pharmacol. 2019 Jul 16;8(9):621–33. doi: 10.1002/psp4.12445 (PMC6765694; doi:10.1002/psp4.12445), 2019-07-16
Supplement: PSP4-8-621-s001.pdf [file PSP4-8-621-s001.pdf]

## Supplementary material

### S1: The “true” model

Covariate effects and interindividual variability (IIV) between subjects was included using the model parameters as follows:

$$PAR_i = TVPAR \cdot PARCOV_i \cdot \exp(\eta_{PAR,i})$$

where  $PAR_i$  is the value of  $PAR$  ( $k_a$ ,  $CL$ ,  $V_2$ ,  $V_3$  or  $Q$ ) in individual  $i$ ,  $TVPAR$  is the typical value of  $PAR$  in the population, and  $\eta_{PAR,i}$  is IIV in  $PAR$  for individual  $i$ , defined as being normally distributed with mean 0 and variance  $\omega_{PAR}^2$ .  $PARCOV_i$  was defined as follows for the effects of body weight and sex:

$$PARCOV_i = \left(\frac{WT_i}{70}\right)^{\theta_{WT,PAR}}$$

for body weight; and

$$PARCOV_i = \begin{cases} 1 & \text{for male subjects, and} \\ 1 + \theta_{SEX,PAR} & \text{for female subjects.} \end{cases}$$

Here,  $WT_i$  is body weight for individual  $i$ ,  $\theta_{WT,PAR}$  is the power coefficient describing the effect of weight on parameter  $PAR$ , and  $\theta_{SEX,PAR}$  is a factor describing the proportional effect of female sex on  $PAR$ .

**Table S1: Structural parameter values in the model used for simulation**

| Parameter                                            | Value | IIV [%CV]    |
|------------------------------------------------------|-------|--------------|
| Clearance (CL, L/h)                                  | 0.121 | 0.0625 [25%] |
| Central volume of distribution ( $V_2$ , L)          | 1.939 | 0.0625 [25%] |
| Peripheral volume of distribution ( $V_3$ , L)       | 5.650 | 0.0625 [25%] |
| Intercompartmental clearance (Q, L/h)                | 0.282 | 0.0900 [30%] |
| First-order absorption rate constant ( $k_a$ )       | 1.050 | 0.0900 [30%] |
| Effect of body weight on CL (power model)            | 0.750 | –            |
| Effect of sex (female) on $V_2$ (proportional model) | 0.200 | –            |

*IIV=interindividual variability; %CV=percentage coefficient of variation.*

Parameter values used for simulation are provided in Table S1, and the IIV variance-covariance matrix  $\omega$  is defined as below:

$$\omega = \begin{bmatrix} \omega_{CL}^2 & & & & & \\ \omega_{CL,V_2} & \omega_{V_2}^2 & & & & \\ \omega_{CL,V_3} & \omega_{V_2,V_3} & \omega_{V_3}^2 & & & \\ \omega_{CL,Q} & \omega_{V_2,Q} & \omega_{V_3,Q} & \omega_Q^2 & & \\ \omega_{CL,k_a} & \omega_{V_2,k_a} & \omega_{V_3,k_a} & \omega_{Q,k_a} & \omega_{k_a}^2 & \end{bmatrix} = \begin{bmatrix} 0.06250 & & & & & \\ 0.03125 & 0.06250 & & & & \\ 0.01563 & 0.03125 & 0.06250 & & & \\ 0.00750 & 0.00750 & 0.00750 & 0.09000 & & \\ 0.00000 & 0.00000 & 0.00000 & 0.00000 & 0.09000 & \end{bmatrix}$$

Correlations were included between model parameters in order to emulate a real-world PK as closely as possible. Proportional residual error was applied to simulated observations, with a value of 7.5%.

For each simulated patient, concentrations were simulated for the following time windows, with daily doses of 1200 mg:

- 0-1 h after first dose;
- 1-3 h after first dose;
- 3-6 h after first dose;
- 6-12 h after first dose;
- 168-169 h after first dose;

- 169-171 h after first dose;
- 171-180 h after first dose; and
- 180-192 h after first dose.

Sampling times were allocated at random within these time windows to generate a dataset with 360 observations (8 per subject). Body weights were generated at random for each subjects with a mean of 70 kg and a standard deviation of 0.15. Sex was assigned at random (50% male, 50% female).

**Figure S1: Simulated concentration plotted against time, by day**

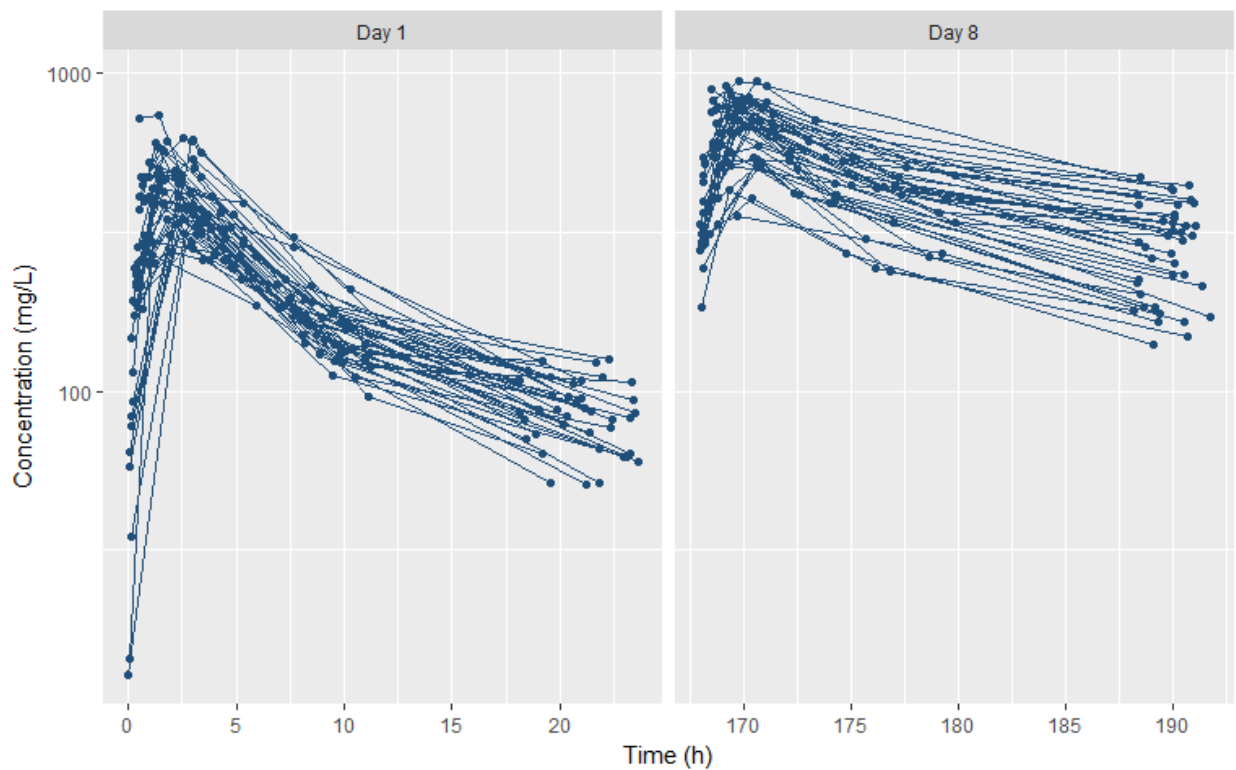

*Points are observations. Lines represent individuals.*

## S2: Intermediate models and output

Diagnostic plots for the one-compartment model are shown in Figure S2. A visual predictive check is provided in Figure S3.

**Figure S2: Basic goodness-of-fit plots for the one-compartment model**

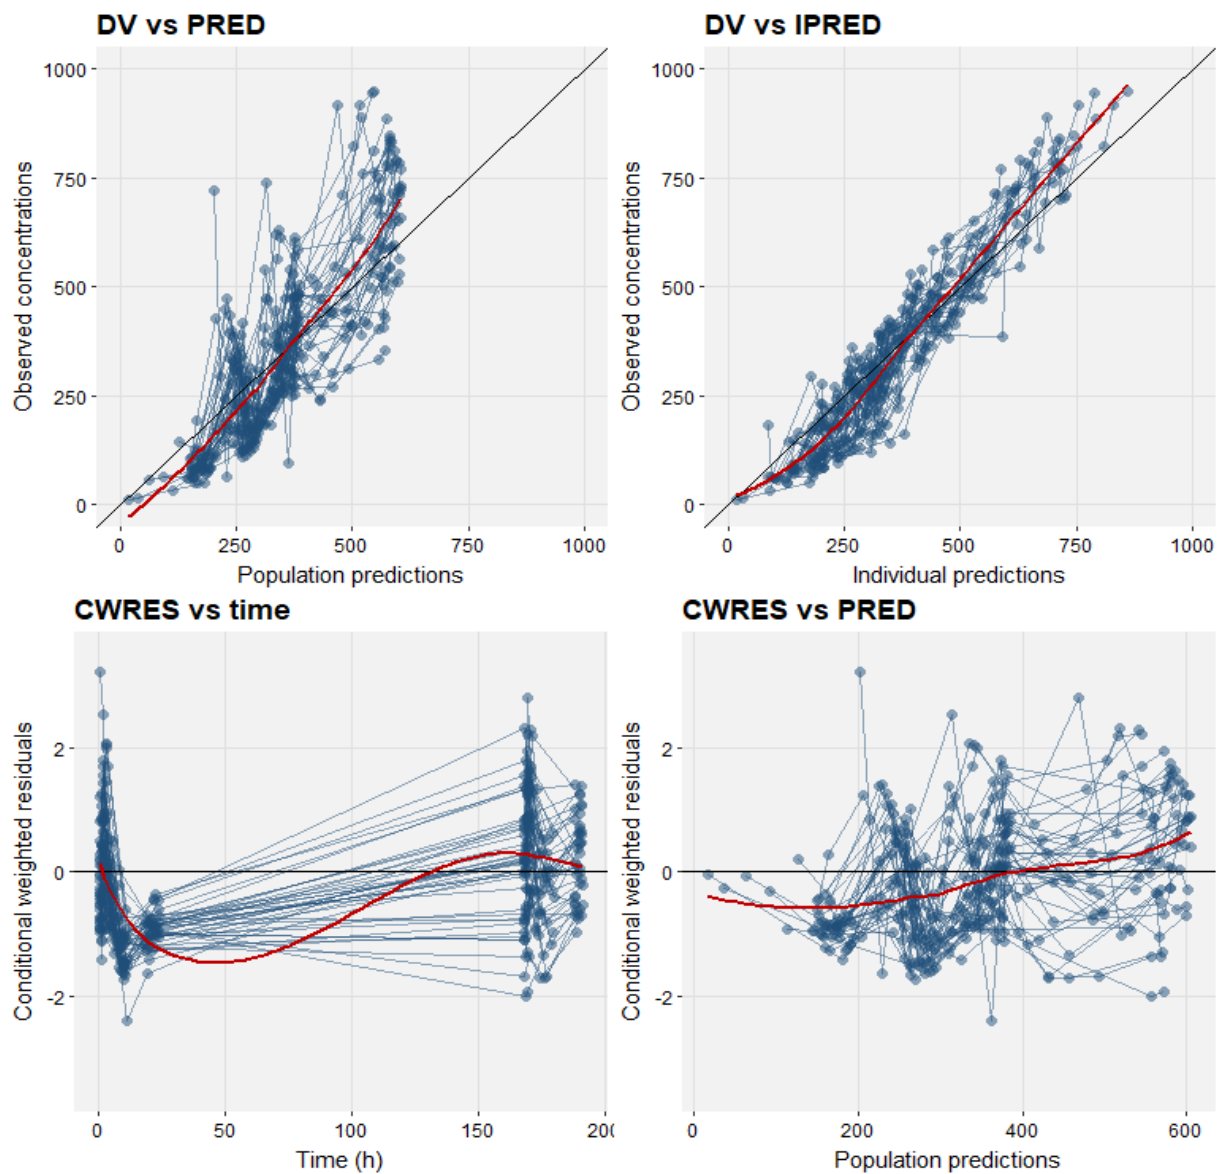

*Blue points are observations. Blue lines represent individuals. Red lines are loess smooths through the data. Black lines are lines of identity.*

**Figure S3: Visual predictive check for the one-compartment model**

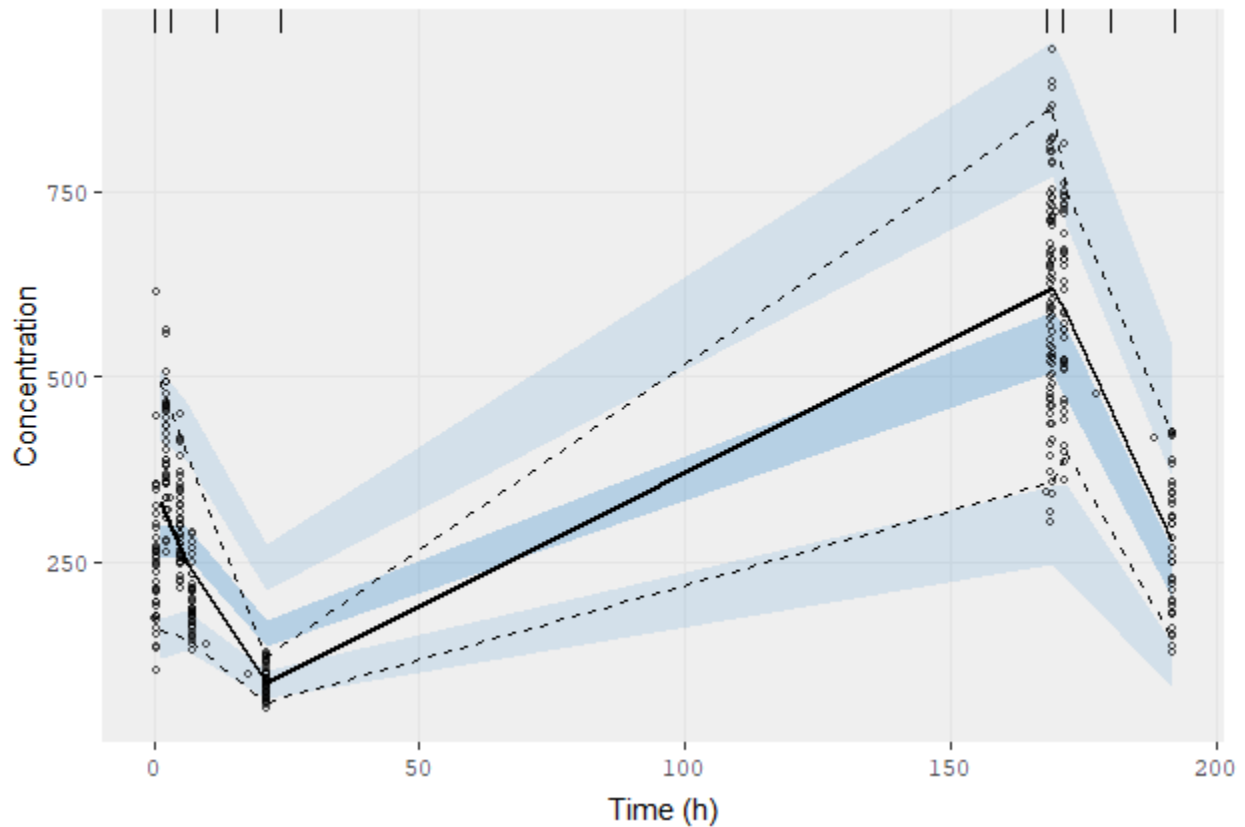

*Black points are original observations. Solid black line is the observed median, by bin. Dashed black lines represent observed 5th and 95th percentiles, by bin. Blue shaded areas represent 90% confidence intervals around simulated 5th, 50th and 95th percentiles. Binning at 0, 3, 12, 24, 168, 171, 180 and 192 hours. N=400 iterations.*

Two-compartment model with additive residual error:

```
model.2cpt.ode <- function() {  
  ini({  
    tka <- log(1.05)  
    tc1 <- log(0.121)  
    tv2 <- log(1.939)  
    tv3 <- log(5.65)  
    tq <- log(0.282)  
    eta.ka ~ 0.1  
    eta.c1 ~ 0.1  
    eta.v2 ~ 0.1  
    eta.v3 ~ 0.1
```

```

eta.q ~ 0.1
add.err <- 75
})
model({
ka <- exp(tka + eta.ka)
cl <- exp(tcl + eta.cl)
v2 <- exp(tv2 + eta.v2)
v3 <- exp(tv3 + eta.v3)
q <- exp(tq + eta.q)
d/dt(depot) = -ka * depot
d/dt(center) = ka * depot - cl / v2 * center + q/v3 * periph - q/v2 * center
d/dt(periph) = q/v2 * center - q/v3 * periph
cp = center / v2
cp ~ add(add.err)
})
}

> fit.2cpt.ode.saem
-- nlmixr SAEM(ODE); OBJF not calculated fit -----
                OBJF          AIC          BIC Log-likelihood Condition Number
FOCEi 2975.608 3659.243 3701.991      -1818.622          8.200009

-- Time (sec; fit.2cpt.ode.saem$time): -----
saem setup optimize covariance table
673.63 89.835          0          0 0.25

-- Population Parameters (fit.2cpt.ode.saem$parFixed or $parFixedDf): -----
      Est.      SE %RSE Back-transformed(95%CI) BSV(CV%) Shrink(SD)%
tka    0.104 0.0659 63.1      1.11 (0.976, 1.26)    39.5      7.66%
tcl    -2.1 0.0486 2.31      0.123 (0.111, 0.135)    30.9     -0.132%
tv2    0.657 0.0382 5.81      1.93 (1.79, 2.08)    21.0     11.6%
tv3    1.68 0.0254 1.51      5.35 (5.1, 5.63)     9.18     83.2%
tq    -1.31 0.052 3.97      0.27 (0.244, 0.299)    27.7     13.7%
add.err 19.8          19.8

Covariance Type (fit.2cpt.ode.saem$covMethod): fim
No correlations in between subject variability (BSV) matrix
Full BSV covariance (fit.2cpt.ode.saem$omega)
or correlation (fit.2cpt.ode.saem$omegaR; diagonals=SDs)
Distribution stats (mean/skewness/kurtosis/p-value) available in $shrink

-- Fit Data (object fit.2cpt.ode.saem is a modified tibble): -----
# A tibble: 360 x 30
  ID  TIME  DV  EVID  PRED  RES  WRES IPRED  IRES  IWRES CPRED  CRES
<fct> <dbl> <dbl> <int> <dbl> <dbl> <dbl> <dbl> <dbl> <dbl> <dbl> <dbl> <dbl>
1 1 0.302 175. 0 172. 3.18 0.0213 168. 6.60 0.333 172. 2.46
2 1 2.91 320. 0 399. -79.0 -0.529 339. -18.9 -0.955 399. -79.7
3 1 3.14 336. 0 387. -50.8 -0.341 328. 8.27 0.418 388. -51.4
# ... with 357 more rows, and 18 more variables: CWRES <dbl>, eta.ka <dbl>,
# eta.cl <dbl>, eta.v2 <dbl>, eta.v3 <dbl>, eta.q <dbl>, ka <dbl>, cl <dbl>,
# v2 <dbl>, v3 <dbl>, q <dbl>, cp <dbl>, depot <dbl>, center <dbl>,
# periph <dbl>, EPRED <dbl>, ERES <dbl>, NPDE <dbl>

```

Two-compartment model with proportional residual error:

```

model.2cftp.ode <- function() {
  ini({
    tka <- log(1.05)
    tc1 <- log(0.121)
    tv2 <- log(1.939)
    tv3 <- log(5.65)
    tq <- log(0.282)
    eta.ka ~ 0.1
    eta.c1 ~ 0.1
    eta.v2 ~ 0.1
    eta.v3 ~ 0.1
    eta.q ~ 0.1
    prop.err <- 0.075
  })
  model({
    ka <- exp(tka + eta.ka)
    c1 <- exp(tc1 + eta.c1)
    v2 <- exp(tv2 + eta.v2)
    v3 <- exp(tv3 + eta.v3)
    q <- exp(tq + eta.q)
    d/dt(depot) = -ka * depot
    d/dt(center) = ka * depot - c1 / v2 * center + q/v3 * periph - q/v2 * center
    d/dt(periph) = q/v2 * center - q/v3 * periph
    cp = center / v2
    cp ~ prop(prop.err)
  })
}

```

> fit.2cftp.ode.saem

-- nlmixr SAEM(ODE); OBJF calculated from FOCEi approximation fit -----

|       | OBJF    | AIC      | BIC      | Log-likelihood | Condition Number |
|-------|---------|----------|----------|----------------|------------------|
| FOCEi | 2899.71 | 3583.346 | 3626.093 | -1780.673      | 3.792522         |

-- Time (sec; fit.2cftp.ode.saem\$time): -----

| saem   | setup | optimize | covariance | table |
|--------|-------|----------|------------|-------|
| 451.64 | 0.491 | 0        | 0          | 0.18  |

-- Population Parameters (fit.2cftp.ode.saem\$parFixed or \$parFixedDf): -----

|          | Est.   | SE     | %RSE | Back-transformed(95%CI) | BSV(CV%) | Shrink(SD)% |
|----------|--------|--------|------|-------------------------|----------|-------------|
| tka      | 0.087  | 0.0619 | 71.1 | 1.09 (0.966, 1.23)      | 37.7%    | 5.15%       |
| tc1      | -2.1   | 0.0464 | 2.21 | 0.122 (0.112, 0.134)    | 29.9%    | -0.455%     |
| tv2      | 0.612  | 0.0344 | 5.63 | 1.84 (1.72, 1.97)       | 19.7%    | 9.69%       |
| tv3      | 1.6    | 0.0322 | 2.01 | 4.98 (4.67, 5.3)        | 18.6%    | 13.2%       |
| tq       | -1.22  | 0.0505 | 4.12 | 0.294 (0.267, 0.325)    | 31.4%    | 3.85%       |
| prop.err | 0.0481 |        |      | 0.0481                  |          |             |

Covariance Type (fit.2cftp.ode.saem\$covMethod): fim  
 No correlations in between subject variability (BSV) matrix  
 Full BSV covariance (fit.2cftp.ode.saem\$omega)  
 or correlation (fit.2cftp.ode.saem\$omegaR; diagonal s=SDs)  
 Distribution stats (mean/skewness/kurtosis/p-value) available in \$shrink

-- Fit Data (object fit.2cftp.ode.saem is a modified tibble): -----

```

# A tibble: 360 x 29
  ID     TIME   DV  PRED    RES    WRES IPRED    IRES   IWRES CPRED  CRES
* <fct> <dbl> <dbl> <dbl> <dbl> <dbl> <dbl> <dbl> <dbl> <dbl> <dbl>
1 1      0.302 175. 176.  -1.51 -0.0574 174.   0.809 0.0966 177.  -2.34
2 1      2.91  320. 401. -81.2 -0.598  337. -17.8  -1.10  402. -82.7
3 1      3.14  336. 388. -52.0 -0.408  326.  10.7   0.682  389. -53.3
# ... with 357 more rows, and 18 more variables: CWRES <dbl>, eta.ka <dbl>,
# eta.cl <dbl>, eta.v2 <dbl>, eta.v3 <dbl>, eta.q <dbl>, ka <dbl>, cl <dbl>,
# v2 <dbl>, v3 <dbl>, q <dbl>, cp <dbl>, depot <dbl>, center <dbl>,
# periph <dbl>, EPRED <dbl>, ERES <dbl>, NPDE <dbl>

```



### Three-compartment model with proportional residual error:

```

model.3cpt.ode <- function() {
  ini({
    tka <- log(1.42)
    tc1 <- log(0.044)
    tv2 <- log(2)
    tv3 <- log(10)
    tv4 <- log(10)
    tq2 <- log(0.5)
    tq3 <- log(0.5)
    eta.ka ~ 0.1
    eta.c1 ~ 0.1
    eta.v2 ~ 0.1
    eta.v3 ~ 0.1
    eta.v4 ~ 0.1
    eta.q2 ~ 0.1
    eta.q3 ~ 0.1
    prop.err <- 0.075
  })
  model({
    ka <- exp(tka + eta.ka)
    c1 <- exp(tc1 + eta.c1)
    v2 <- exp(tv2 + eta.v2)
    v3 <- exp(tv3 + eta.v3)
    v4 <- exp(tv4 + eta.v4)
    q2 <- exp(tq2 + eta.q2)
    q3 <- exp(tq3 + eta.q3)
    d/dt(depot) = -ka * depot
    d/dt(center) = ka * depot - c1 / v2 * center + q2/v3 * periph1 - q2/v2 * center + q3/v4 *
    periph2 - q3/v2 * center
    d/dt(periph1) = q2/v2 * center - q2/v3 * periph1
    d/dt(periph2) = q3/v2 * center - q3/v4 * periph2
    cp = center / v2
    cp ~ prop(prop.err)
  })
}

```

> fit.3cpt.ode.saem

```

-- nlmixr SAEM(ODE); OBJF not calculated fit -----
      OBJF      AIC      BIC Log-likelihood Condition Number
FOCEi 2911.829 3603.465 3661.757      -1786.733           73.30701

-- Time (sec; fit.3cpt.ode.saem$time): -----
saem  setup optimize covariance table
589.77 101.516      0      0 0.23

-- Population Parameters (fit.3cpt.ode.saem$parFixed or $parFixedDf): -----
      Est.      SE %RSE Back-transformed(95%CI) BSV(CV%) Shrink(SD)%
tka      0.081 0.0566 69.8      1.08 (0.971, 1.21)      35.8      6.24%
tc1     -2.42 0.0575 2.38      0.089 (0.0795, 0.0996)      35.3      8.57%
tv2      0.605 0.0332 5.49      1.83 (1.72, 1.95)      20.3      11.1%
tv3       2.76  0.22   8      15.7 (10.2, 24.2)      142.      45.2%
tv4       1.38 0.0272 1.98      3.96 (3.75, 4.17)      11.7      54.4%
tq2     -2.85 0.0745 2.61      0.0578 (0.05, 0.0669)      43.7      31.3%
tq3     -1.32 0.0593 4.49      0.267 (0.238, 0.3)      36.9      5.43%

```

prop. err 0.0469

0.0469

Covariance Type (fit.3cpt.ode.saem\$covMethod): **fm**

No correlations in between subject variability (BSV) matrix

Full BSV covariance (fit.3cpt.ode.saem\$omega)

or correlation (fit.3cpt.ode.saem\$omegaR; diagonals=SDs)

Distribution stats (mean/skewness/kurtosis/p-value) available in \$shrink

-- Fit Data (object fit.3cpt.ode.saem is a modified tibble): -----

# A tibble: 360 x 35

| ID    | TIME  | DV    | EVID  | PRED  | RES   | WRES  | IPRED   | IRES  | IWRES | CPRED  |      |
|-------|-------|-------|-------|-------|-------|-------|---------|-------|-------|--------|------|
| <fct> | <dbl> | <dbl> | <int> | <dbl> | <dbl> | <dbl> | <dbl>   | <dbl> | <dbl> | <dbl>  |      |
| 1     | 1     | 0.302 | 175.  | 0     | 177.  | -1.80 | -0.0755 | 174.  | 0.587 | 0.0718 | 177. |
| 2     | 1     | 2.91  | 320.  | 0     | 404.  | -84.4 | -0.678  | 341.  | -21.1 | -1.32  | 403. |
| 3     | 1     | 3.14  | 336.  | 0     | 391.  | -55.2 | -0.473  | 329.  | 7.61  | 0.494  | 390. |

# ... with 357 more rows, and 24 more variables: CRES <dbl>, CWRES <dbl>, eta.ka <dbl>, eta.cl <dbl>, eta.v2 <dbl>, eta.v3 <dbl>, eta.v4 <dbl>, eta.q2 <dbl>, eta.q3 <dbl>, ka <dbl>, cl <dbl>, v2 <dbl>, v3 <dbl>, v4 <dbl>, q2 <dbl>, q3 <dbl>, cp <dbl>, depot <dbl>, center <dbl>, periph1 <dbl>, periph2 <dbl>, EPRED <dbl>, ERES <dbl>, NPDE <dbl>

## Two-compartment model with proportional residual error and weight on CL:

```

model.2cpt.ode.wtcl <- function() {
  ini({
    tka <- log(1.14)
    tcl <- log(0.0190)
    tv2 <- log(2.12)
    tv3 <- log(20.4)
    tq <- log(0.383)
    wteff <- 0.35
    eta.ka ~ 1
    eta.cl ~ 1
    eta.v2 ~ 1
    eta.v3 ~ 1
    eta.q ~ 1
    prop.err <- 0.075
  })
  model({
    ka = exp(tka + eta.ka)
    cl = exp(tcl + wteff*lnWT + eta.cl)
    v2 = exp(tv2 + eta.v2)
    v3 = exp(tv3 + eta.v3)
    q = exp(tq + eta.q)
    d/dt(depot) = -ka * depot
    d/dt(center) = ka * depot - cl / v2 * center + q/v3 * periph - q/v2 * center
    d/dt(periph) = q/v2 * center - q/v3 * periph
    cp = center / v2
    cp ~ prop(prop.err)
  })
}

```

> fit.2cpt.ode.wtcl.saem

```

-- nlmixr SAEM(ODE); OBJF not calculated fit -----
      OBJF      AIC      BIC Log-likelihood Condition Number
FOCEi 2876.8 3562.436 3609.069      -1769.218           48.85183

-- Time (sec; fit.2cpt.ode.wtcl.saem$time): -----
saem setup optimize covariance table
409.92 69.635      0      0 0.23

-- Population Parameters (fit.2cpt.ode.wtcl.saem$parFixed or $parFixedDf): -----
      Est.      SE %RSE Back-transformed(95%CI) BSV(CV%) Shrink(SD)%
tka      0.129  0.056 43.4      1.14 (1.02, 1.27)      33.7      5.49%
tcl     -2.03  0.0402 1.98      0.132 (0.122, 0.142)      22.3      0.342%
tv2      0.645  0.033 5.12      1.91 (1.79, 2.03)      20.9      8.80%
tv3      1.61  0.0328 2.04      5.02 (4.71, 5.35)      19.2      15.6%
tq     -1.26  0.0502 3.99      0.284 (0.258, 0.314)      32.4      3.62%
wteff    0.875  0.224 25.6      2.4 (1.55, 3.72)
prop.err 0.0483      0.0483

Covariance Type (fit.2cpt.ode.wtcl.saem$covMethod): fim
No correlations in between subject variability (BSV) matrix
Full BSV covariance (fit.2cpt.ode.wtcl.saem$omega)
or correlation (fit.2cpt.ode.wtcl.saem$omegaR; diagonal s=SDs)
Distribution stats (mean/skewness/kurtosis/p-value) available in $shrink

```

```

-- Fit Data (object fit.2cpt.ode.wtcl.saem is a modified tibble): -----
# A tibble: 360 x 31
  ID     TIME     DV  EVID  lnWT  PRED    RES    WRES  IPRED    IRES    IWRES  CPRED
  <fct> <dbl> <dbl> <int> <dbl> <dbl> <dbl> <dbl> <dbl> <dbl> <dbl> <dbl>
1 1      0.302  175.    0 -0.297  177.  -2.48 -0.103  174.    0.657  0.0780  178.
2 1      2.91   320.    0 -0.297  406. -86.4  -0.684  336.  -16.5  -1.02   404.
3 1      3.14   336.    0 -0.297  394. -58.2  -0.488  324.   11.7   0.748  392.
# ... with 357 more rows, and 19 more variables: CRES <dbl>, CWRES <dbl>,
# eta.ka <dbl>, eta.cl <dbl>, eta.v2 <dbl>, eta.v3 <dbl>, eta.q <dbl>,
# ka <dbl>, cl <dbl>, v2 <dbl>, v3 <dbl>, q <dbl>, cp <dbl>, depot <dbl>,
# center <dbl>, periph <dbl>, EPRED <dbl>, ERES <dbl>, NPDE <dbl>

```

Two-compartment model with proportional residual error and sex on  $V_2$ :

```

model.2cpt.ode.sexv2 <- function() {
  ini({
    tka <- log(1.14)
    tc1 <- log(0.0190)
    tv2 <- log(2.12)
    tv3 <- log(20.4)
    tq <- log(0.383)
    sexeff <- -0.2
    eta.ka ~ 1
    eta.c1 ~ 1
    eta.v2 ~ 1
    eta.v3 ~ 1
    eta.q ~ 1
    prop.err <- 0.075
  })
  model({
    ka = exp(tka + eta.ka)
    c1 = exp(tc1 + eta.c1)
    v2 = exp(tv2 + sexeff*(SEX) + eta.v2)
    v3 = exp(tv3 + eta.v3)
    q = exp(tq + eta.q)
    d/dt(depot) = -ka * depot
    d/dt(center) = ka * depot - c1 / v2 * center + q/v3 * periph - q/v2 * center
    d/dt(periph) = q/v2 * center - q/v3 * periph
    cp = center / v2
    cp ~ prop(prop.err)
  })
}

```

> fit.2cpt.ode.sexv2.saem

```

-- nlmixr SAEM(ODE); OBJF not calculated fit -----
              OBJF      AIC      BIC Log-likelihood Condition Number
FOCEi 2894.738 3580.374 3627.007      -1778.187          735.6578

-- Time (sec; fit.2cpt.ode.sexv2.saem$time): -----
saem setup optimize covariance table
627.42 68.036      0      0 0.14

-- Population Parameters (fit.2cpt.ode.sexv2.saem$parFixed or $parFixedDf): -----

```

|          | Est.   | SE      | %RSE  | Back-transformed(95%CI) | BSV(CV%) | Shrink(SD)% |
|----------|--------|---------|-------|-------------------------|----------|-------------|
| tka      | 0.106  | 0.0556  | 52.3  | 1.11 (0.997, 1.24)      | 34.1     | 5.42%       |
| tc1      | -2.1   | 0.0466  | 2.21  | 0.122 (0.111, 0.134)    | 29.9     | -0.448%     |
| tv2      | 0.718  | 0.0345  | 4.81  | 2.05 (1.92, 2.19)       | 19.6     | 16.2%       |
| tv3      | 1.61   | 0.0519  | 3.22  | 5.01 (4.53, 5.55)       | 18.8     | 13.0%       |
| tq       | -1.24  | 0.00209 | 0.169 | 0.289 (0.287, 0.29)     | 32.3     | 4.04%       |
| sexeff   | -0.158 | 0.0324  | 20.5  | 0.854 (0.801, 0.91)     |          |             |
| prop.err | 0.0479 |         |       | 0.0479                  |          |             |

```

Covariance Type (fit.2cpt.ode.sexv2.saem$covMethod): fim
No correlations in between subject variability (BSV) matrix
Full BSV covariance (fit.2cpt.ode.sexv2.saem$omega)
or correlation (fit.2cpt.ode.sexv2.saem$omegaR; diagonal s=SDs)
Distribution stats (mean/skewness/kurtosis/p-value) available in $shrink

```

```

-- Fit Data (object fit.2cpt.ode.sexv2.saem is a modified tibble): -----
# A tibble: 360 x 31
  ID      TIME    DV  EVID  SEX  PRED  RES  WRES  IPRED  IRES  IWRES  CPRED
  <fct> <dbl> <dbl> <int> <dbl> <dbl> <dbl> <dbl> <dbl> <dbl> <dbl> <dbl>
1 1      0.302  175.    0     0  162.  13.1  0.658  174.   0.671  0.0804  162.
2 1      2.91   320.    0     0  378. -58.8 -0.540  338. -18.0  -1.12   384.
3 1      3.14   336.    0     0  368. -31.7 -0.308  326.  10.4   0.669  373.
# ... with 357 more rows, and 19 more variables: CRES <dbl>, CWRES <dbl>,
# eta.ka <dbl>, eta.cl <dbl>, eta.v2 <dbl>, eta.v3 <dbl>, eta.q <dbl>,
# ka <dbl>, cl <dbl>, v2 <dbl>, v3 <dbl>, q <dbl>, cp <dbl>, depot <dbl>,
# center <dbl>, periph <dbl>, EPRED <dbl>, ERES <dbl>, NPDE <dbl>

```

The final model fitted using FOCE with interaction shows a higher OFV (after removing IIV on  $V_3$  and  $Q$  for reasons of stability), but parameter estimates are close to the “true” values and those obtained from SAEM:

```
> fit.2cpt.ode.wtcl.sexv2.foce
-- nlmixr FOCEi (outer: nlminb) fit -----
      OBJF      AIC      BIC Log-likelihood Condition Number
FOCEi 3019.554 3703.189 3745.937   -1840.595           43.57929

-- Time (sec; fit.2cpt.ode.wtcl.sexv2.foce$time): -----
      setup optimize covariance table
elapsed 73.741 128.545 128.545 0.2

-- Population Parameters ($parFixed or $parFixedDf): -----
      Est.      SE %RSE Back-transformed(95%CI) BSV(CV%) Shrink(SD)%
tka      0.196 0.0615 31.4      1.22 (1.08, 1.37) 47.1      6.10%
tcl      -2.02 0.0389 1.93      0.132 (0.123, 0.143) 21.7      1.94%
tv2      0.789 0.0754 9.56      2.2 (1.9, 2.55) 29.4      5.36%
tv3      1.55 0.0394 2.53      4.73 (4.38, 5.11)
tq      -1.34 0.0542 4.04      0.262 (0.235, 0.291)
wteff    0.83 0.117 14.1      2.29 (1.82, 2.88)
sexeff   -0.158 0.102 64.4      0.854 (0.7, 1.04)
prop.err 0.0809                                0.0809

Covariance Type (fit.2cpt.ode.wtcl.sexv2.foce$covMethod): r, s
No correlations in between subject variability (BSV) matrix
Full BSV covariance (fit.2cpt.ode.wtcl.sexv2.foce$omega)
  or correlation (fit.2cpt.ode.wtcl.sexv2.foce$omegar; diagonals=SDs)
Distribution stats (mean/skewness/kurtosis/p-value) available in $shrink
Minimization message (fit.2cpt.ode.wtcl.sexv2.foce$message):
  false convergence (8)
In an ODE system, false convergence may mean "useless" evaluations were performed.
See https://stackoverflow.com/questions/40039114/r-nlminb-what-does-false-convergence-actually-mean

-- Fit Data (object fit.2cpt.ode.wtcl.sexv2.foce is a modified tibble): -----
# A tibble: 360 x 30
  ID    TIME    DV  EVID  SEX  lnWT  PRED  RES  WRES  IPRED  IRES  IWRES
  <fct> <dbl> <dbl> <int> <dbl> <dbl> <dbl> <dbl> <dbl> <dbl> <dbl> <dbl>
1 1      0.302 175.    0     0 -0.297 163.  11.6  0.149 174.  1.14  0.0808
2 1      2.91  320.    0     0 -0.297 378. -58.2 -0.139 331. -11.8 -0.440
3 1      3.14  336.    0     0 -0.297 369. -32.4 -0.0816 323. 12.8  0.491
# ... with 357 more rows, and 18 more variables: CPRED <dbl>, CRES <dbl>,
# CWRES <dbl>, eta.ka <dbl>, eta.cl <dbl>, eta.v2 <dbl>, rx1c <dbl>,
# ka <dbl>, cl <dbl>, v2 <dbl>, v3 <dbl>, q <dbl>, depot <dbl>,
# central <dbl>, peripheral <dbl>, EPRED <dbl>, ERES <dbl>, NPDE <dbl>
```

### S3: nlmixr tuning options and support functions

Table S2 shows the most useful control parameters for the nlme algorithm. These are not usually required but can be useful. An example illustrating usage is shown below:

```
nlmixr(fit, data,
      est = "nlme",
      control = nlmeControl(maxIter=100,
                           niterEm=50))
```

Additional information may be obtained from the R online help (?nlmeControl).

**Table S2: Commonly-used control options for the nlme algorithm in nlmixr**

| Parameter      | Purpose                                                                                                 |
|----------------|---------------------------------------------------------------------------------------------------------|
| maxIter        | Maximum number of iterations (default 50)                                                               |
| pnlsMaxIter    | Maximum iterations for PNLs optimization (default 7)                                                    |
| msMaxIter      | Maximum number of iterations for NLM optimization (default 50)                                          |
| minScale       | Minimum scaling factor for PNLs (default 0.001)                                                         |
| tolerance      | Convergence tolerance (default $1e^{-6}$ )                                                              |
| niterEm        | Iterations for EM step (default 25)                                                                     |
| pnlsTol        | Tolerance for PNLs step (default $1e^{-3}$ )                                                            |
| msTol          | Tolerance for MS step (default $1e^{-7}$ )                                                              |
| returnObject   | Return object after unsuccessful convergence (default FALSE)                                            |
| msVerbose      | Show trace details for NLM (default FALSE)                                                              |
| apVar          | Calculate approximate covariance matrix (default TRUE)                                                  |
| .relStep       | Relative step size for numerical derivatives                                                            |
| minAbsParApVar | Minimum absolute parameter value in the approximate variance calculation (default 0.05)                 |
| opt            | Optimizer ('nllminb' [default] or 'nllm')                                                               |
| natural        | Use natural parameterization for general positive definite matrices (pdSymm) in reStruct (default TRUE) |
| sigma          | Fixed residual error. Calculate if NULL (default) or 0                                                  |

Table S3 shows the most useful control parameters for the SAEM algorithm. These are most commonly used for tuning the number of iterations used and the number of Markov chains. An example illustrating usage is shown below:



```
nlmixr(fit, data,
      est = "saem",
      control = saemControl(seed=740727,
                           n.burn=250,
                           n.em=250))
```

Additional information may be obtained from the R online help (`?saemControl`).

**Table S3: Commonly-used control options for the SAEM algorithm in nlmixr**

| Parameter   | Purpose                                                                                                                                                                         |
|-------------|---------------------------------------------------------------------------------------------------------------------------------------------------------------------------------|
| seed        | Random seed (default 99)                                                                                                                                                        |
| n.burn      | Number of iterations in the stochastic approximation (burn-in) step (default 200)                                                                                               |
| n.em        | Number of iterations in the expectation maximization step (default 300)                                                                                                         |
| nmc         | Number of Markov chains (default 3)                                                                                                                                             |
| nu          | Numbers of transitions of kernels used in the Metropolis-Hastings algorithm. Default is $c(2, 2, 2)$ , representing 40 for each transition initially (each is multiplied by 20) |
| atol        | Absolute convergence tolerance (default $1e^{-8}$ )                                                                                                                             |
| rtol        | Relative convergence tolerance (default $1e^{-6}$ )                                                                                                                             |
| stiff       | Flag for stiff ODE systems (uses LSODA, default TRUE)                                                                                                                           |
| transit_abs | Flag for transit absorption model (default TRUE)                                                                                                                                |
| print       | Iterations to be completed before printing an update to the console (default 1)                                                                                                 |

Table S4 shows the most useful control parameters for the FOCEi family of algorithms.

These are most commonly used for tuning the outer optimization method and the ODE/convergence criterion (based on significant digits [`sigdig`], though this is not equivalent to NONMEM's SIGDIG). An example illustrating usage is shown below:

```
nlmixr(fit, data,
      est = "focei",
      control = foceiControl(outerOpt="bobyqa", sigdig=3))
```

Additional information may be obtained from the R online help (`?foceiControl`).

**Table S4: Commonly-used control options for the FOCEi family of algorithms (fo, foi, foce and focei) in nlmixr**

| <b>Parameter</b>          | <b>Purpose</b>                                                                                                                                                                                                             |
|---------------------------|----------------------------------------------------------------------------------------------------------------------------------------------------------------------------------------------------------------------------|
| <b>outerOpt</b>           | Outer Optimization Routine (the default is "nlmimb", but it can be others like "bobyqa", or "lbfgsb3")                                                                                                                     |
| <b>Sigdig</b>             | Controls tolerances of estimation and ODE solving routines. Not the same as NONMEM sigdig parameter but with similar meaning (the default is 4)                                                                            |
| <b>scaleC</b>             | Custom scaling for focei optimization If left blank, these are scaled based on the parsed parameter type and initial estimates. This can be manually adjusted to provide a better estimation when scaling causes problems. |
| <b>covMethod</b>          | Covariance method "r,s" uses sandwich matrix, "r" uses hessian matrix and "s" uses cross-product matrix. "" does not calculate covariance/standard errors                                                                  |
| <b>maxOuterIterations</b> | Maximum number of outer iterations before stopping overall parameter estimation                                                                                                                                            |
| <b>maxInnerIterations</b> | Maximum number of inner iterations before stopping individual eta estimation.                                                                                                                                              |

Table S5 provides a summary of the most useful fit object properties provided by nlmixr (accessed using `fit$property`, where `property` is the property of interest).

**Table S5: nlmixr fit object properties (accessed by `fit$property`)**

| <b>Property</b>                 | <b>Purpose</b>                               |
|---------------------------------|----------------------------------------------|
| <code>\$par.hist</code>         | Parameter history, if available              |
| <code>\$par.hist.stacked</code> | Stacked parameter history, if available      |
| <code>\$parFixed</code>         | Fixed-effect parameter table                 |
| <code>\$eta</code>              | Individual random effects                    |
| <code>\$omega</code>            | Between-subject covariance matrix            |
| <code>\$omegaR</code>           | Between-subject correlation matrix           |
| <code>\$covMethod</code>        | Covariance method                            |
| <code>\$model.name</code>       | Model name                                   |
| <code>\$data.name</code>        | Name of input data frame                     |
| <code>\$shrink</code>           | Distribution statistics, including shrinkage |
| <code>\$time</code>             | Time used for steps in fitting process       |

Table S6 shows the parameter combinations recognized by the `linCmt()` function when assigning a solved-system PK model.

**Table S6: Parameter combinations recognized by `linCmt()` to infer solved systems**

| <b>1-Compartment PK</b> | <b>2-compartment PK</b> | <b>3-compartment PK</b>     |
|-------------------------|-------------------------|-----------------------------|
| CL, V                   | CL, Vc, Q, Vp           | CL, Vc, Q, Vp1, Vp2         |
| Kel, V                  | Kel, k12, k21, V        | Kel, k12, k21, k13, k31, V  |
| A, alpha                | A, alpha, B, beta       | A, alpha, B, beta, C, gamma |

Parameter aliases are also supported, e.g.  $V=Vc=V1$  for 1-compartment model. Case does not matter. Parameter aliases are context dependent; the first can be volume = Vc (can start with V2); second numbered volume = Vp. All NONMEM style parameters are supported. Where ka is present, first-order oral absorption is inferred; compartment 1 is then depot.

## S4: shinyMixR functions

Table S7 provides a summary of key shinyMixR functions.

**Table S7: shinyMixR functions**

| <b>Function</b>              | <b>Purpose</b>                                                                |
|------------------------------|-------------------------------------------------------------------------------|
| <code>create_proj()</code>   | Create folder structure for a shinyMixR project                               |
| <code>run_nmx()</code>       | Run an nlmixr model fit                                                       |
| <code>overview()</code>      | Create overview of all models in a project                                    |
| <code>tree_overview()</code> | Create collapsible tree overview for visualizing relationships between models |
| <code>gof_plot()</code>      | Create general goodness-of-fit plots                                          |
| <code>fit_plot()</code>      | Create individual plots                                                       |
| <code>get_proj()</code>      | Get project information with available models and high-level results          |

## S5: Required R packages

| Package<br>[version]            | Details                                                                                                                                                                                                                                               | Recommended source                               |
|---------------------------------|-------------------------------------------------------------------------------------------------------------------------------------------------------------------------------------------------------------------------------------------------------|--------------------------------------------------|
| <b>Core packages</b>            |                                                                                                                                                                                                                                                       |                                                  |
| <i>nlmixr</i><br>[1.1.0-3]      | Fidler ML, Xiong Y, Schoemaker R, Wilkins JJ, Trame M, Post TM, Wang W (2018). <i>nlmixr: Nonlinear Mixed Effects Models in Population Pharmacokinetics and Pharmacodynamics</i> .                                                                    | github.com/<br>nlmixrdevelopment/nlmixr          |
| <i>RxODE</i><br>[0.9.0-2]       | Fidler ML, Hallow M, Wang W (2018). <i>RxODE: Facilities for Simulating from ODE-Based Models</i> .                                                                                                                                                   | github.com/<br>nlmixrdevelopment/RxODE           |
| <i>shinyMixR</i><br>[0.1.4]     | Hooijmaijers R, Post TM (2018). <i>shinyMixR: Shiny dashboard interface for nlmixr</i>                                                                                                                                                                | github.com/<br>RichardHooijmaijers/<br>shinyMixR |
| <b>Support packages</b>         |                                                                                                                                                                                                                                                       |                                                  |
| <i>lbfgsb3c*</i><br>[2018-2.13] | Fidler ML, Nash JC, Zhu C, Byrd R, Nocedal J, Morales JL (2018). <i>Limited Memory BFGS Minimizer with Bounds on Parameters with optim() 'C' Interface</i> .                                                                                          | github.com/<br>nlmixrdevelopment/lbfgsb3c        |
| <i>n1qn1</i><br>[6.0.1-3]       | Fidler M, Wang W, Lemarechal C, Bonnans J, Gilbert JC, Sagastizabal C, Campbell SL, Chancelier JP, Nikoukhah R, Eddelbuettel D, Jofret B, INRIA (2018). <i>Port of the 'Scilab' 'n1qn1' and 'qnb' Modules for (Un)constrained BFGS Optimization</i> . | github.com/<br>nlmixrdevelopment/n1qn1           |
| <i>PreciseSums</i><br>[0.3]     | Fidler ML, Hettinger R, Shewchuk J, Taylor J, Smith N (2018). <i>PreciseSums: Accurate Floating Point Sums and Products</i> .                                                                                                                         | github.com/<br>nlmixrdevelopment/<br>PreciseSums |
| <i>SnakeCharmR**</i><br>[1.0.7] | Sieira A [forked from rPython by Gil Bellosta CJ] (2017). <i>SnakeCharmR: R and Python Integration</i> .                                                                                                                                              | github.com/<br>nlmixrdevelopment/<br>SnakeCharmR |
| <i>vpc</i><br>[1.1.0]           | Keizer R (2018). <i>vpc: Create Visual Predictive Checks</i> .                                                                                                                                                                                        | github.com/ronkeizer/vpc                         |
| <i>xpose</i><br>[0.4.4]         | Guiastrennec B, Hooker AC, Olofsson A, Ueckert S, Keizer R, Karlsson MO                                                                                                                                                                               | github.com/<br>UUPharmacometrics/xpose           |

(2018). xpose: Diagnostics for  
Pharmacometric Models.

*xpose.nlmixr*  
[0.1.4]

Wilkins JJ, Fidler ML, Guiastrennec B,  
Hooker AC, Olofsson A, Ueckert S,  
Keizer R, Karlsson MO (2018).  
xpose.nlmixr: Graphical Diagnostics  
for Pharmacometric Models:  
Extension to 'nlmixr'.

github.com/  
nlmixrdevelopment/  
xpose.nlmixr

---

\* Forked from [github.com/cran/lbfgsb3](https://github.com/cran/lbfgsb3)

\*\* Forked from [github.com/asiembra/SnakeCharmR](https://github.com/asiembra/SnakeCharmR)

Additional direct support packages are required by nlmixr and are available on the Comprehensive R Archive Network (CRAN): brew, cli, collapsibleTree, crayon, devtools, digest, dparser, DT, fastGHQuad, ggplot2, gridExtra, inline, lbfgs, magrittr, memoise, minqa, mvnfast, numDeriv, R.utils, Rcpp, RcppArmadillo, rex, shiny, shinyAce, shinyBS, shinydashboard, shinyFiles, stringi, tidyr, whisker, and all dependencies. It is recommended to use the most recent available versions.
